# Supplementary material for: Synthesis of morphology-improved single-crystalline iron silicide nanowires with enhanced physical characteristics
Source: Royal Society of Chemistry journal article supplement (doi:10.1039/d1ce00267h), 2021-01-01
Supplement: d1ce00267h2.pdf [file d1ce00267h2.pdf]

THE UNIVERSITY OF CHICAGO

PHYSICS DEPARTMENT
