# Supplementary figures and images for: Synthesis of morphology-improved single-crystalline iron silicide nanowires with enhanced physical characteristics
Source: Royal Society of Chemistry journal article supplement (doi:10.1039/d1ce00267h), 2021-01-01

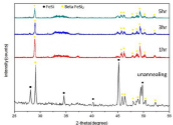

Supplement: d1ce00267h3.pdf [file d1ce00267h3.pdf]
